# Supplementary material for: Pharmacometrics of high-dose ivermectin in early COVID-19 from an open label, randomized, controlled adaptive platform trial (PLATCOV)
Source: eLife. 2023 Feb 21;12:e83201. doi: 10.7554/eLife.83201 (PMC9988254; doi:10.7554/eLife.83201)
Supplement: Supplementary file 1. [file elife-83201-supp1.xlsx]

## Sheet: Sheet1
	All grades			Grade 3-4
	Ivermectin (n=46)	Casirivimab/ imdevimab	No study drug (n=45)	Ivermectin (n=46)	Casirivimab/ imdevimab	No study drug (n=45)
		(n=10)			(n=10)
Any adverse event (Grade ³ 3)	0	0	2
Serious adverse event reported	0	0	2
Symptoms
Fever				0	0	0
Headache				0	0	0
Dizziness				0	0	0
Blurred vision				0	0	0
Fatigue				0	0	0
Cough				0	0	0
Difficulty breathing				0	0	0
Chest pain				0	0	0
Runny nose				0	0	0
Loss of smell or taste				0	0	0
Abdominal pain				0	0	0
Loss of appetite				0	0	0
Nausea				0	0	0
Vomiting				0	0	0
Diarrhoea				0	0	0
Arthralgia				0	0	0
Myalgia				0	0	0
Itching				0	0	0
Skin rash				0	0	0
Laboratory abnormalites
Creatinine				0	0	0
BUN				0	0	0
Sodium				0	0	0
eGFR				0	0	0
Potassium				0	0	0
ALT/SGPT				0	0	0
AST/SGOT				0	0	0
Total bilirubin				0	0	0
Direct bilirubin				0	0	0
Alkaline Phosphatase				0	0	0
LDH				0	0	0
Creatinine phosphokinase (CPK)				0	0	2*
Anaemia				0	0	0
Leukocytopenia				0	0	0
Neutropenia				0	0	0
Thrombocytopenia				0	0	0
*Both patients were also classified as serious adverse events and are detailed in the serious adverse events table (Table: 2). All AEs solicited were reported between days 0-7 and at day 28.
