# Supplementary material for: Pharmacometrics of high-dose ivermectin in early COVID-19 from an open label, randomized, controlled adaptive platform trial (PLATCOV)
Source: eLife. 2023 Feb 21;12:e83201. doi: 10.7554/eLife.83201 (PMC9988254; doi:10.7554/eLife.83201)
Supplement: Supplementary file 2. [file elife-83201-supp2.xlsx]

## Sheet: Sheet1
Number	Study arm	Final diagnosis	Relationship to trial drug	Resolved
1	No study drug	Reduction in activities of daily living after COVID-19 infection 1	Not related	Yes
2	No study drug	COVID-induced rhabdomyolysis 2	Not related	Yes
3	No study drug	COVID-induced rhabdomyolysis 2	Not related	Yes
1Participant was impeded in activities of daily living one day post-discharge from the ward (day 8) and was readmitted for further investigation complaining of right-sided chest pain and lethargy. Clinical observations including oxygen saturations, physical examination and electrocardiogram were unremarkable, laboratory investigations including inflammatory markers and D-Dimers were in the normal…
2Both participants had an acute rise in creatinine phosphokinase (CPK) during admission. Myoglobin was not detected on urinalysis. A diagnosis of COVID-induced rhabdomyolysis was made by the clinical team based on symptoms of myalgia and a raised CPK without another identifiable etiology. Nephrology review advised supportive treatment only. Symptoms resolved, the CPK normalized and was within nor…
