# Supplementary figures and images for: Pharmacometrics of high-dose ivermectin in early COVID-19 from an open label, randomized, controlled adaptive platform trial (PLATCOV)
Source: eLife journal article supplement (doi:10.7554/elife.83201), 2023-02-06

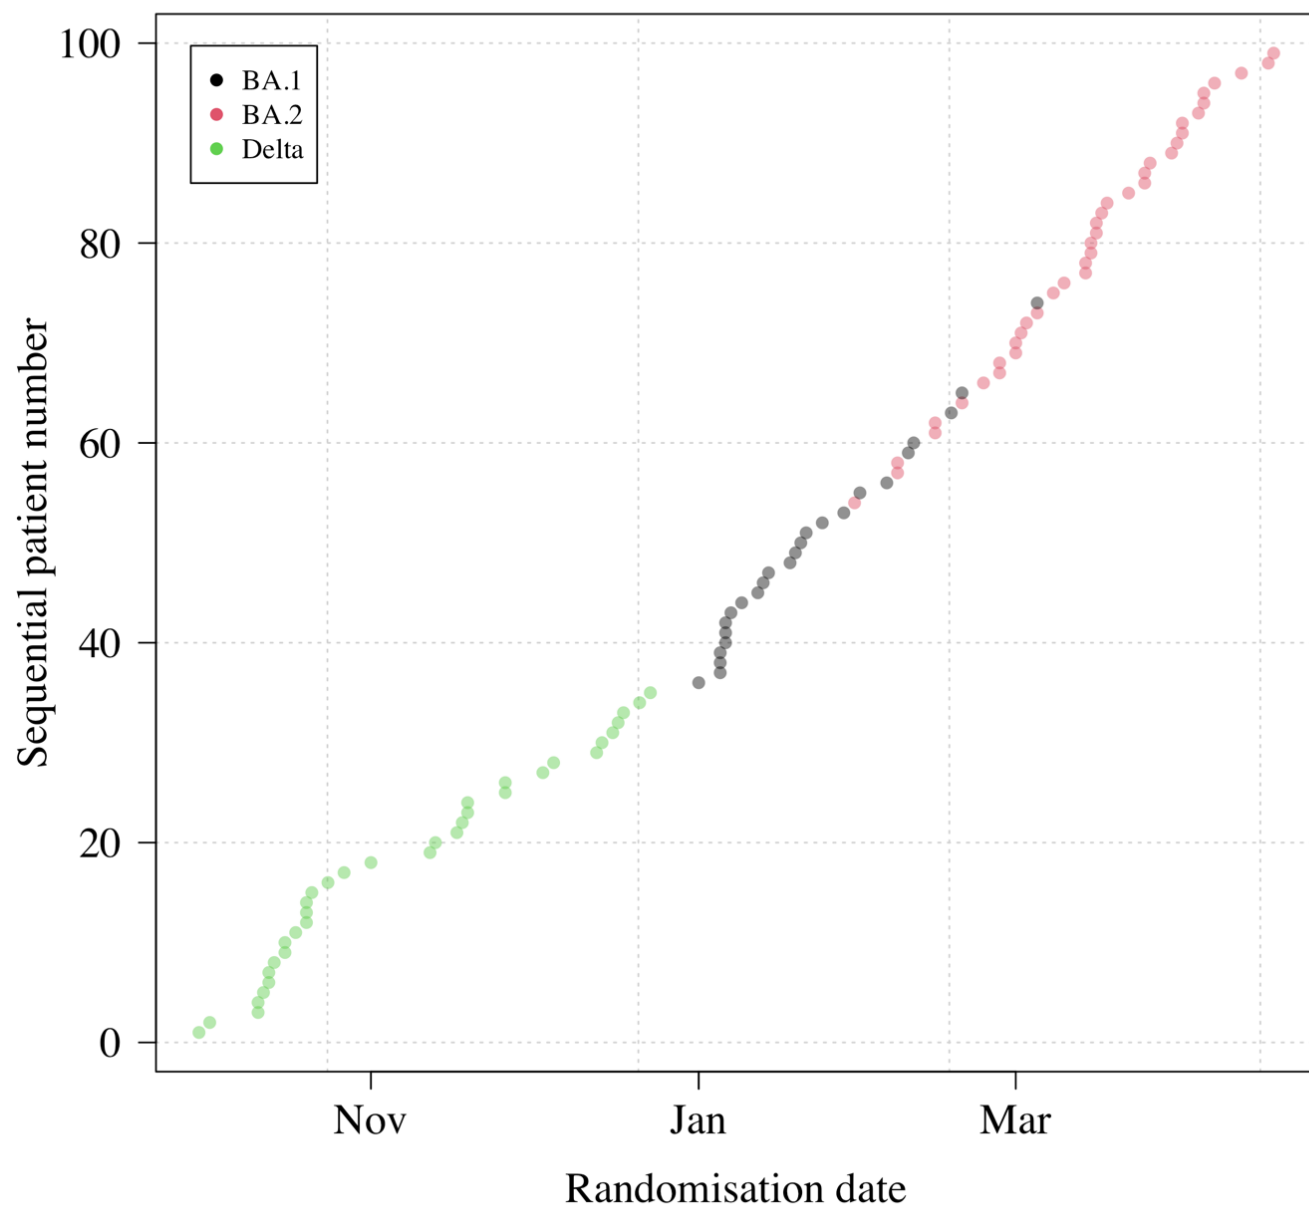

Supplement: supp [file elife_poa_e83201_Figure_1_figure_supplement_1.pdf › elife_poa_e83201_Figure_1_figure_supplement_1.pdf]

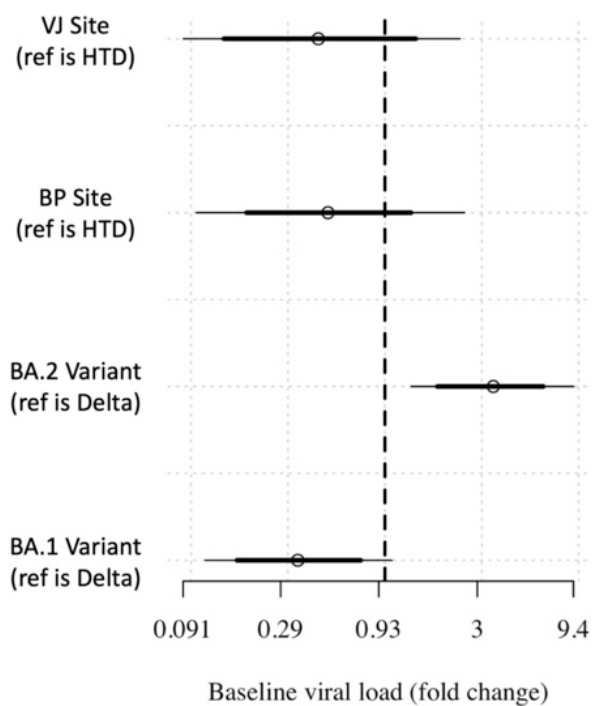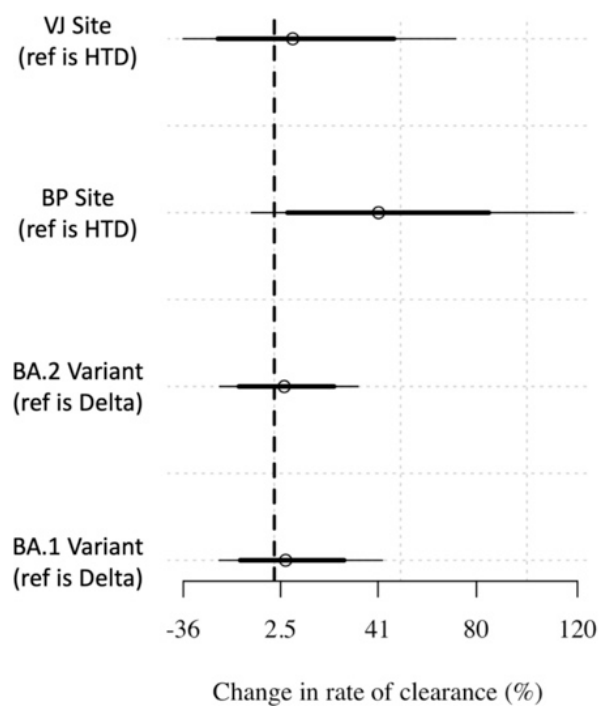

Supplement: supp [file elife_poa_e83201_Figure_4_figure_supplement_1.pdf › elife_poa_e83201_Figure_4_figure_supplement_1.pdf]

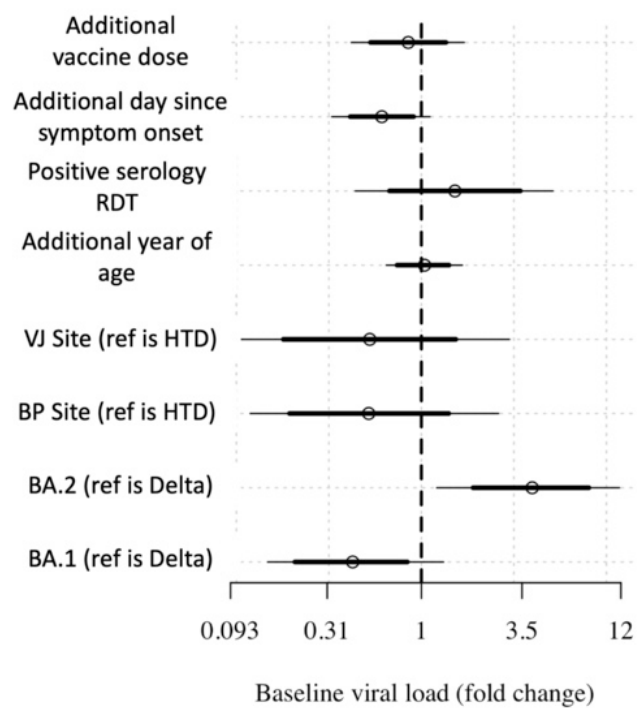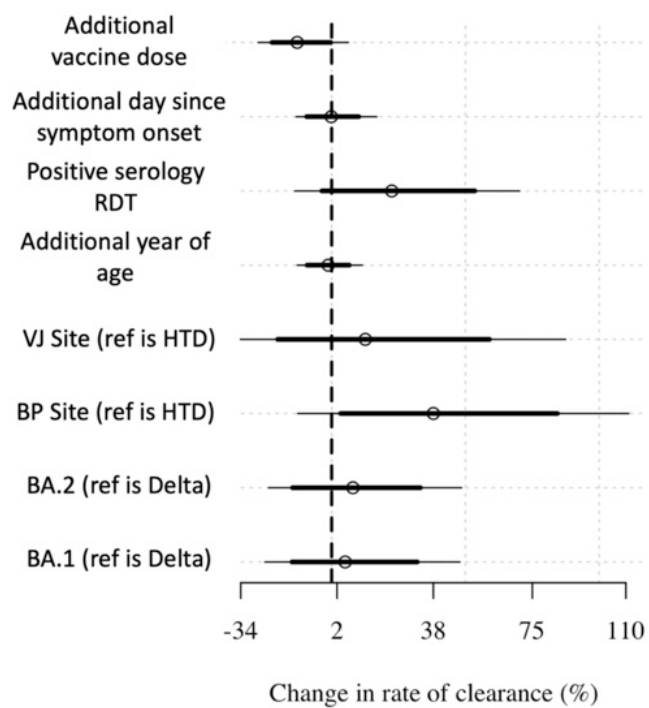

Supplement: supp [file elife_poa_e83201_Figure_4_figure_supplement_2.pdf › elife_poa_e83201_Figure_4_figure_supplement_2.pdf]

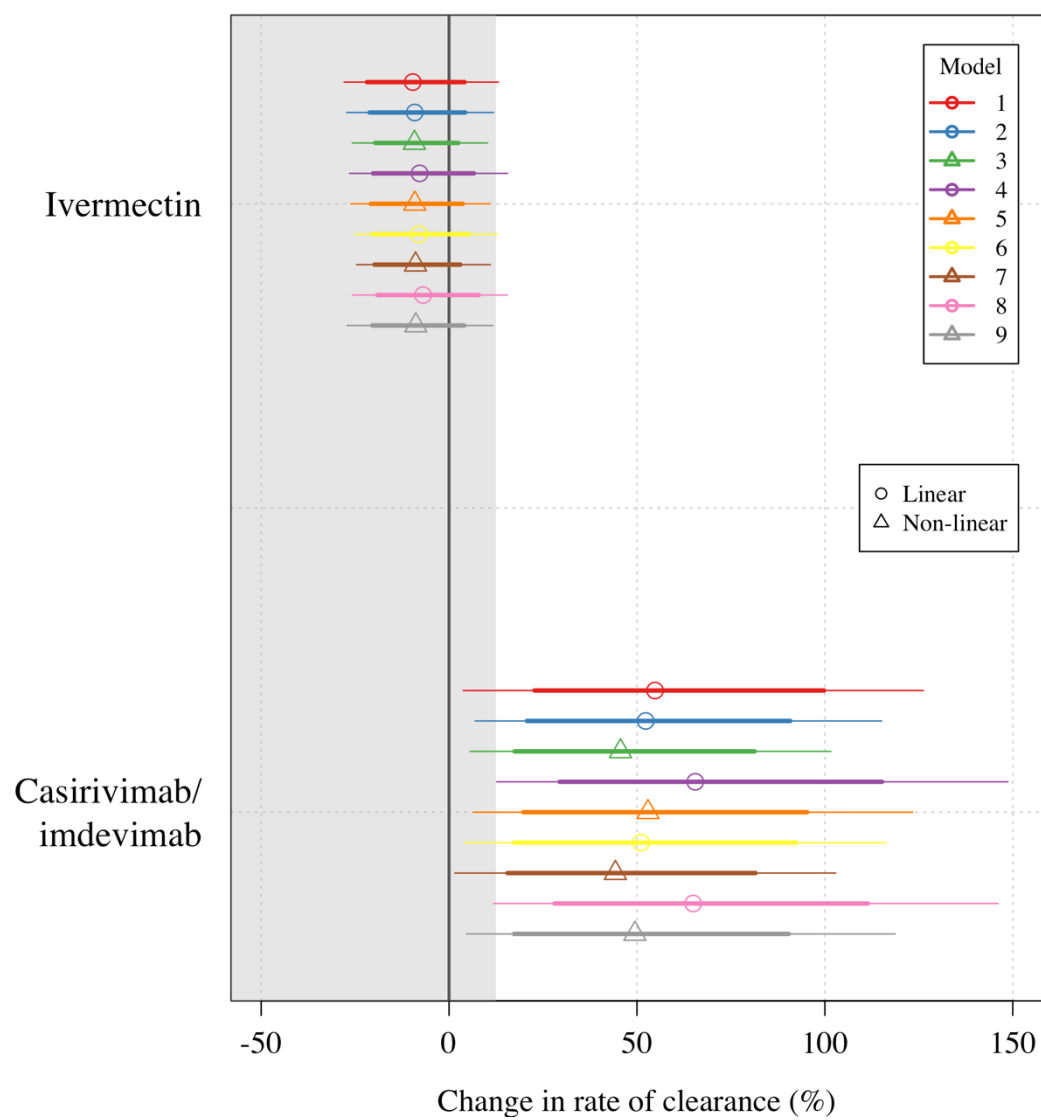

Supplement: supp [file elife_poa_e83201_Figure_4_figure_supplement_3.pdf › elife_poa_e83201_Figure_4_figure_supplement_3.pdf]

No study drug

Ivermectin

Casirivimab/  
imdevimab

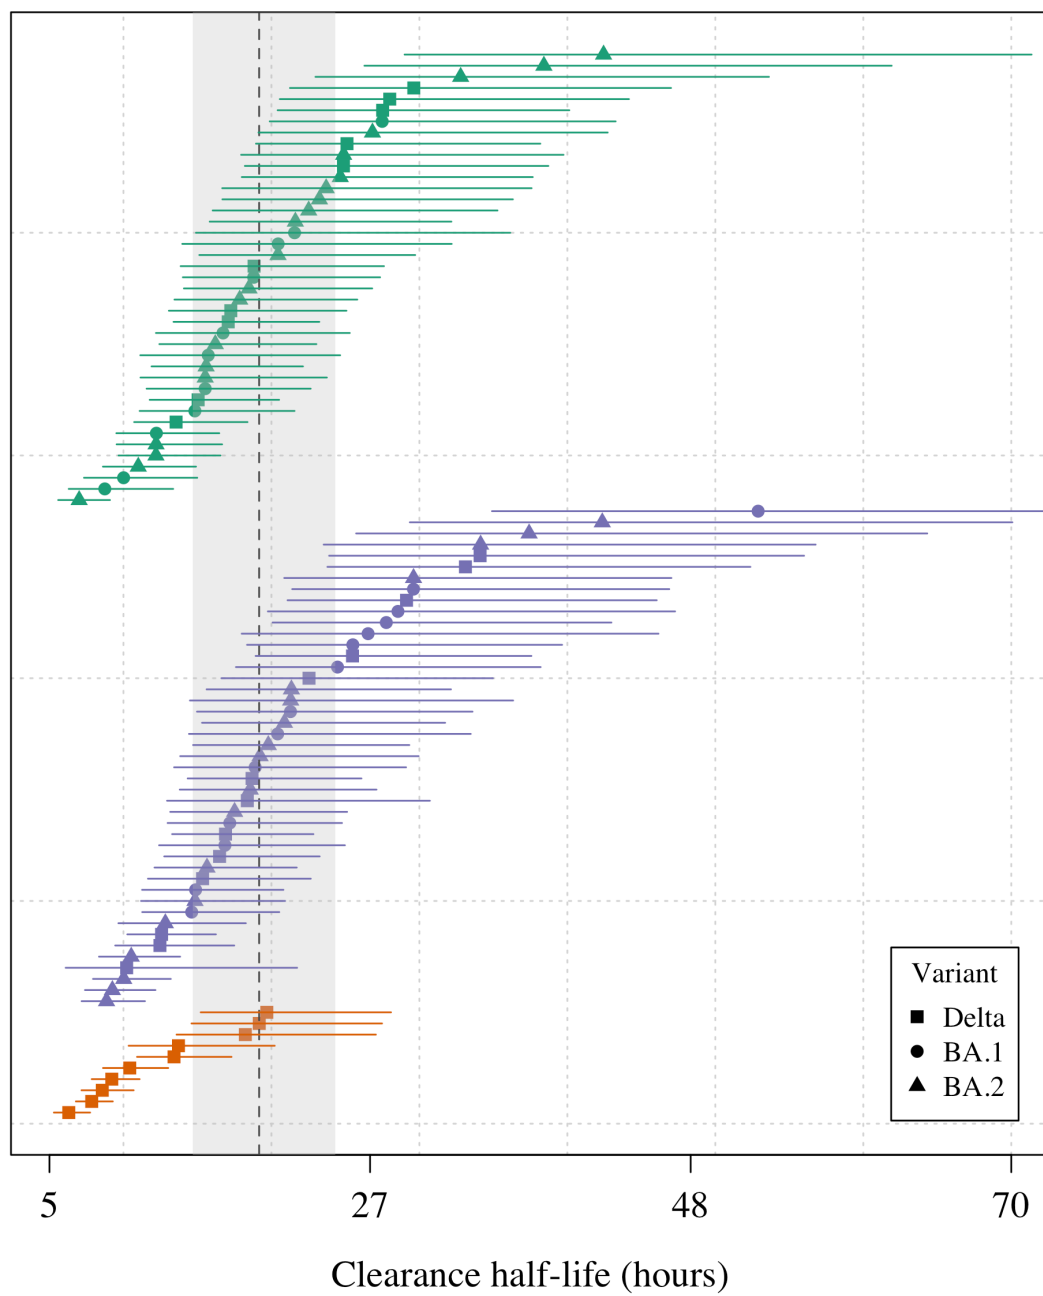

Supplement: supp [file elife_poa_e83201_Figure_5_figure_supplement_1.pdf › elife_poa_e83201_Figure_5_figure_supplement_1.pdf]

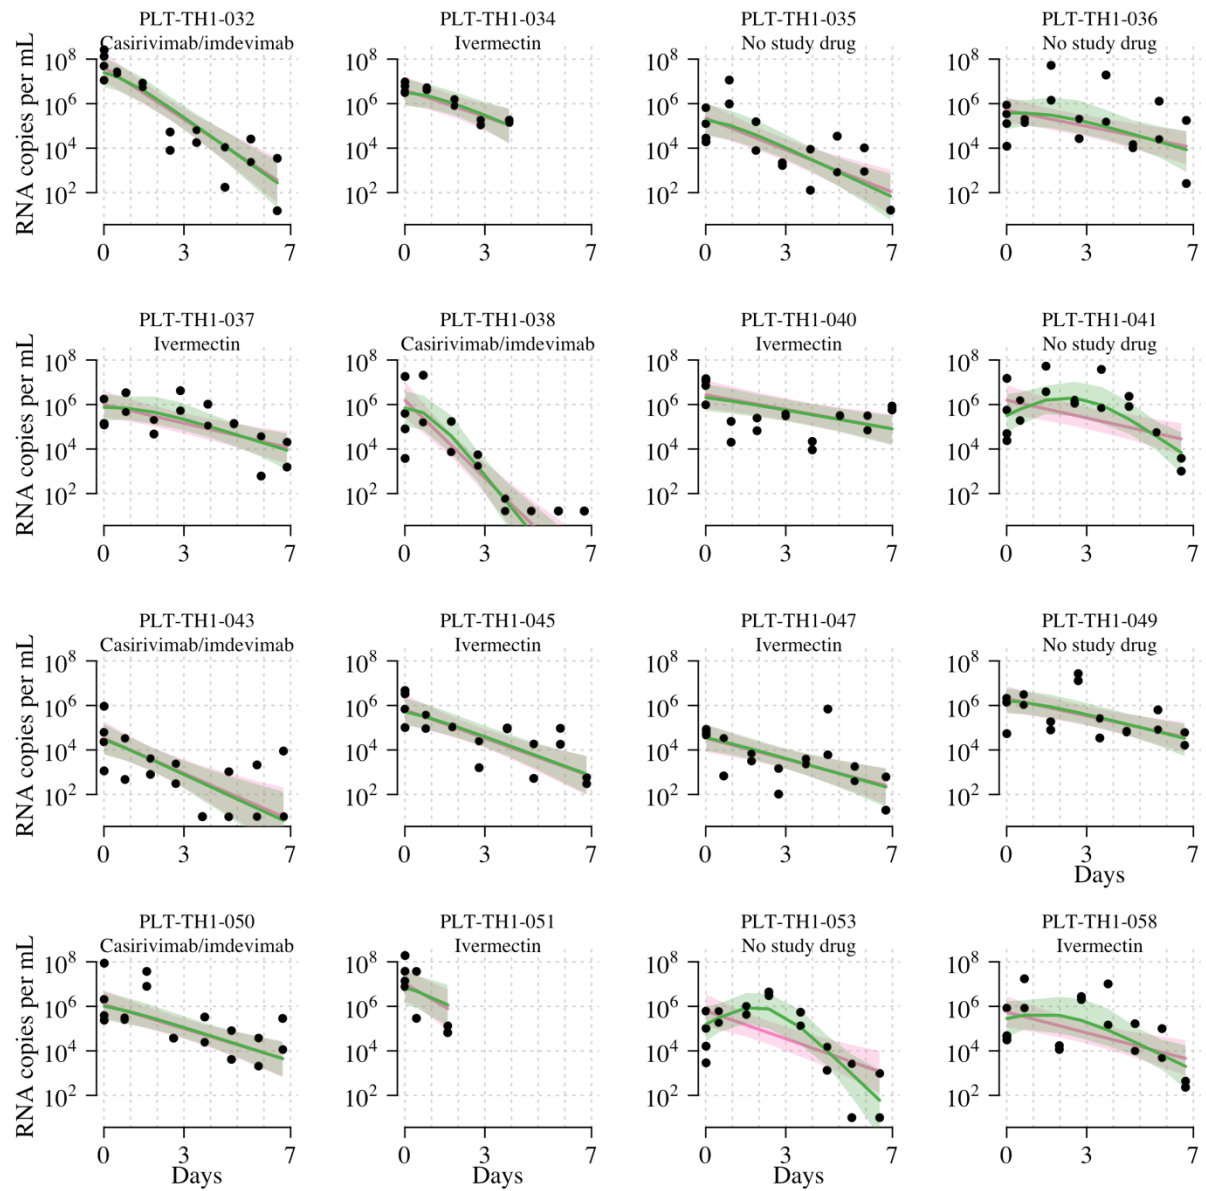

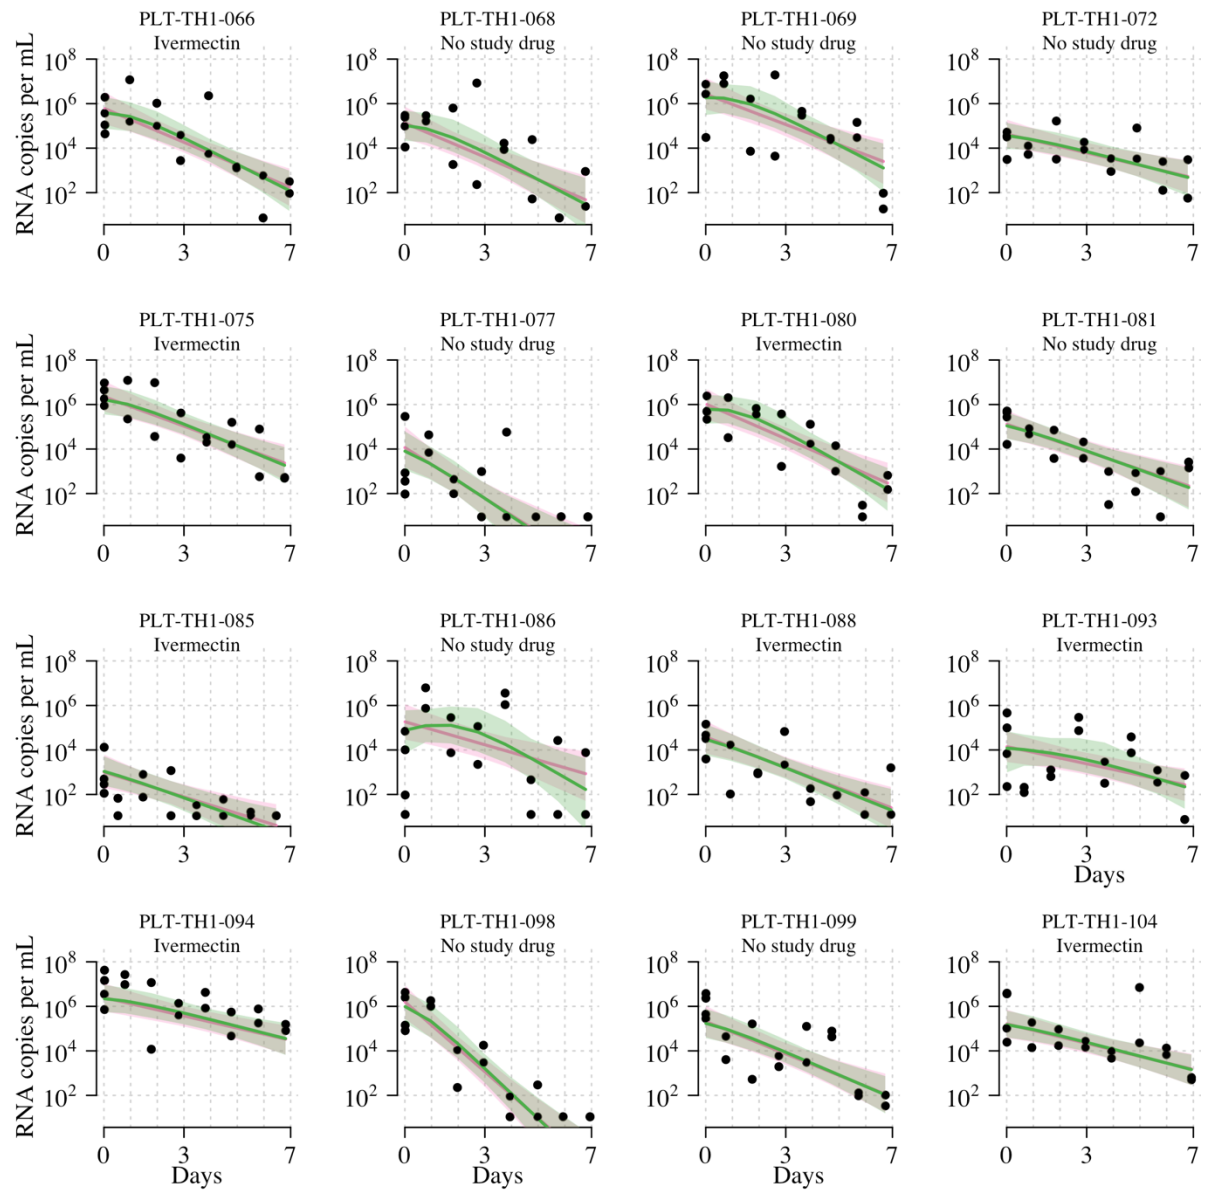

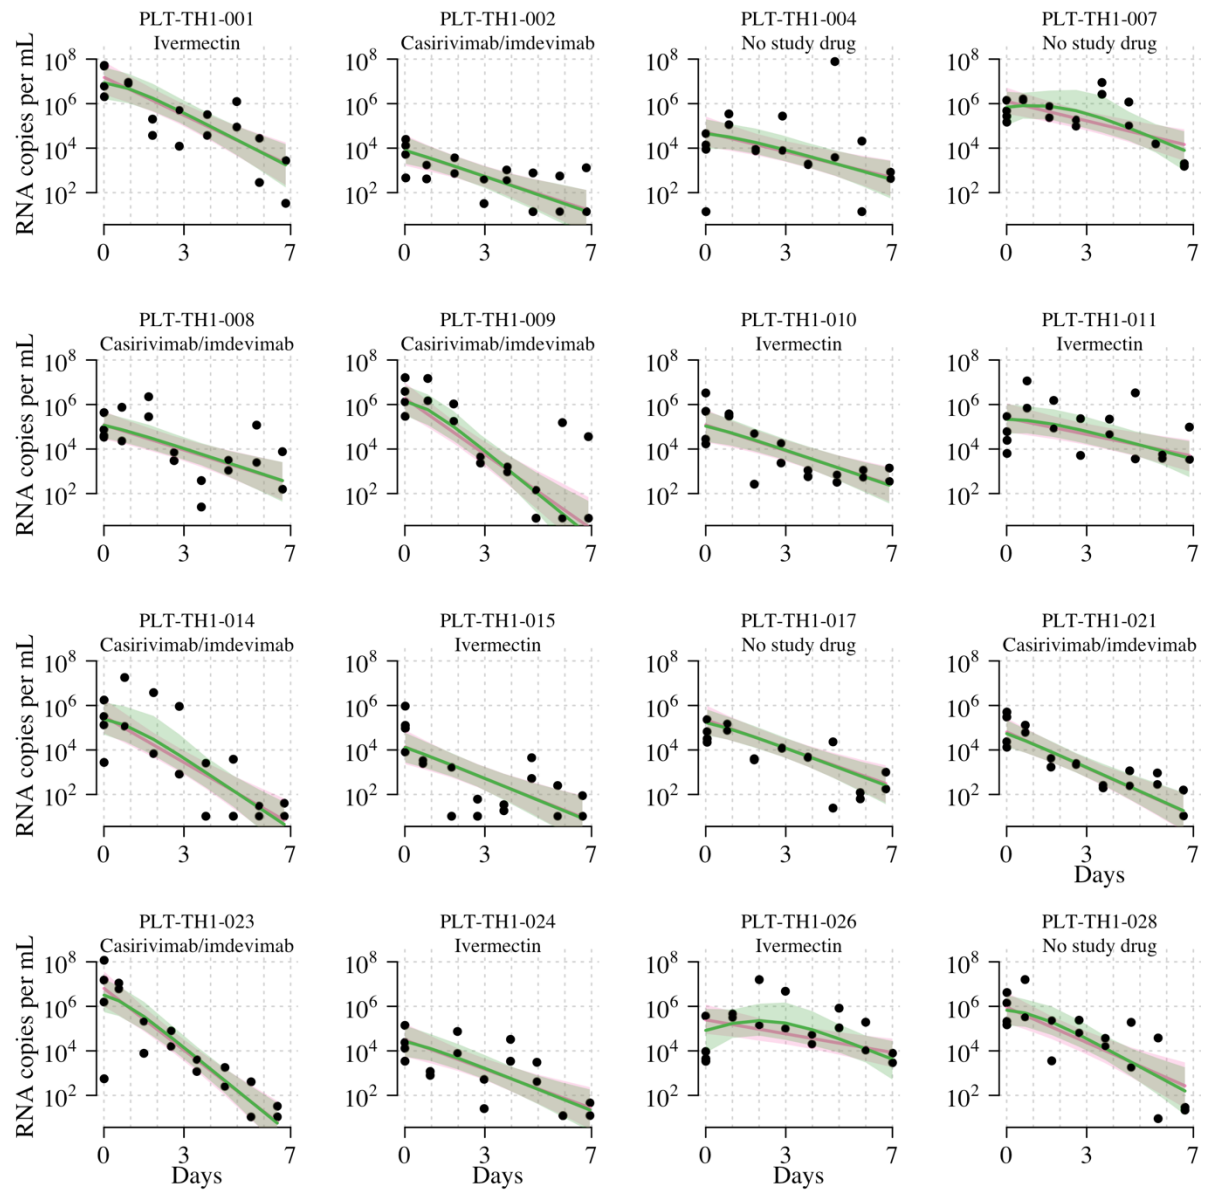

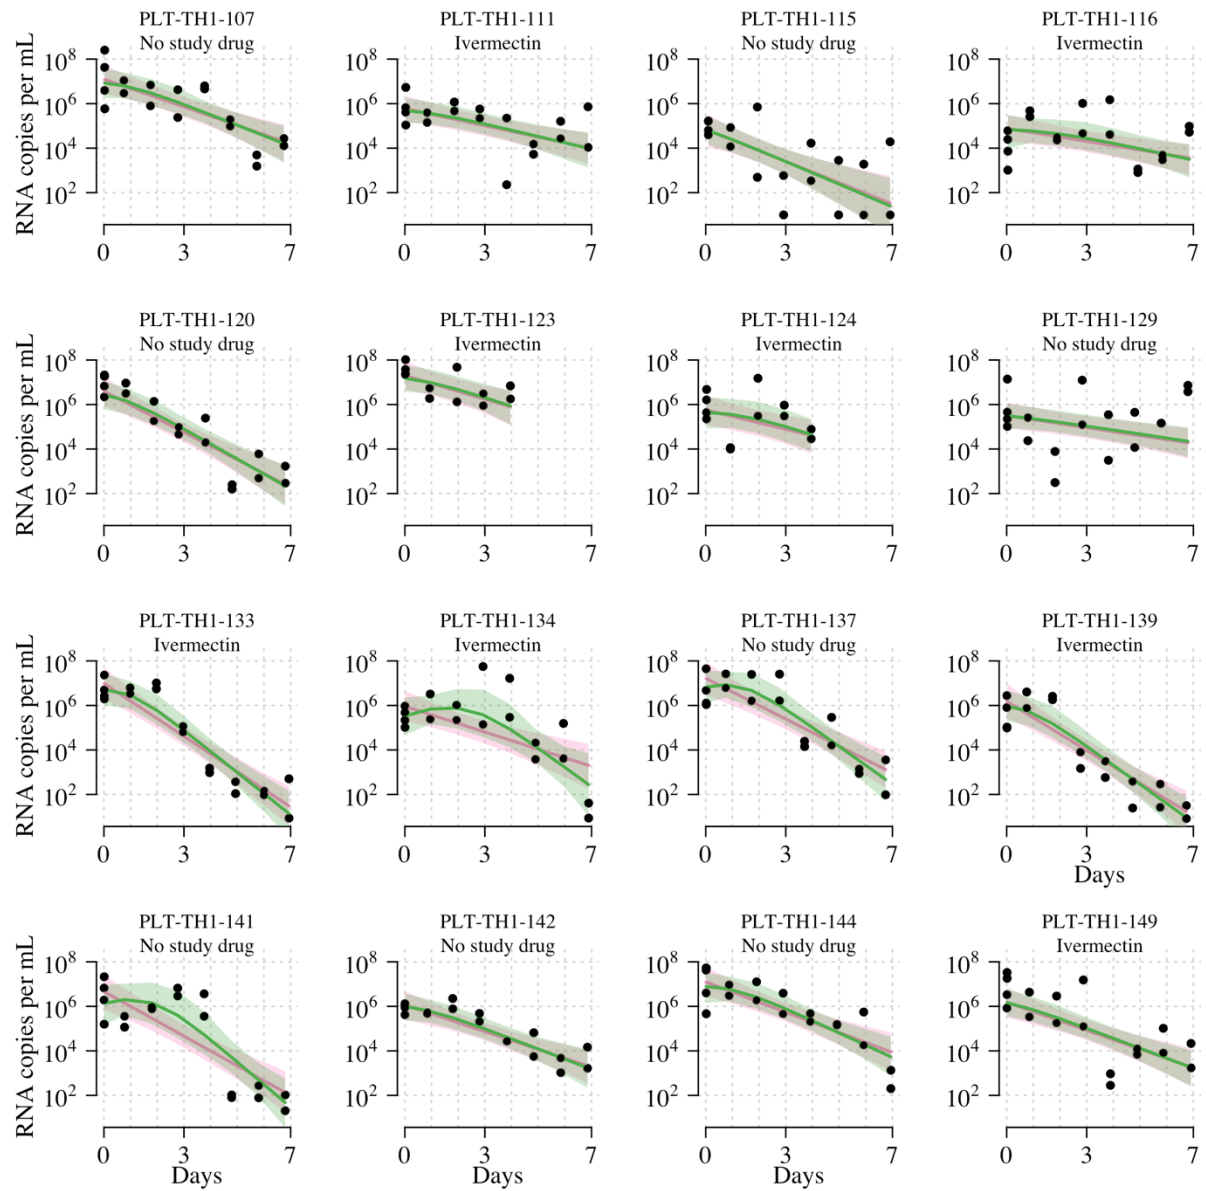

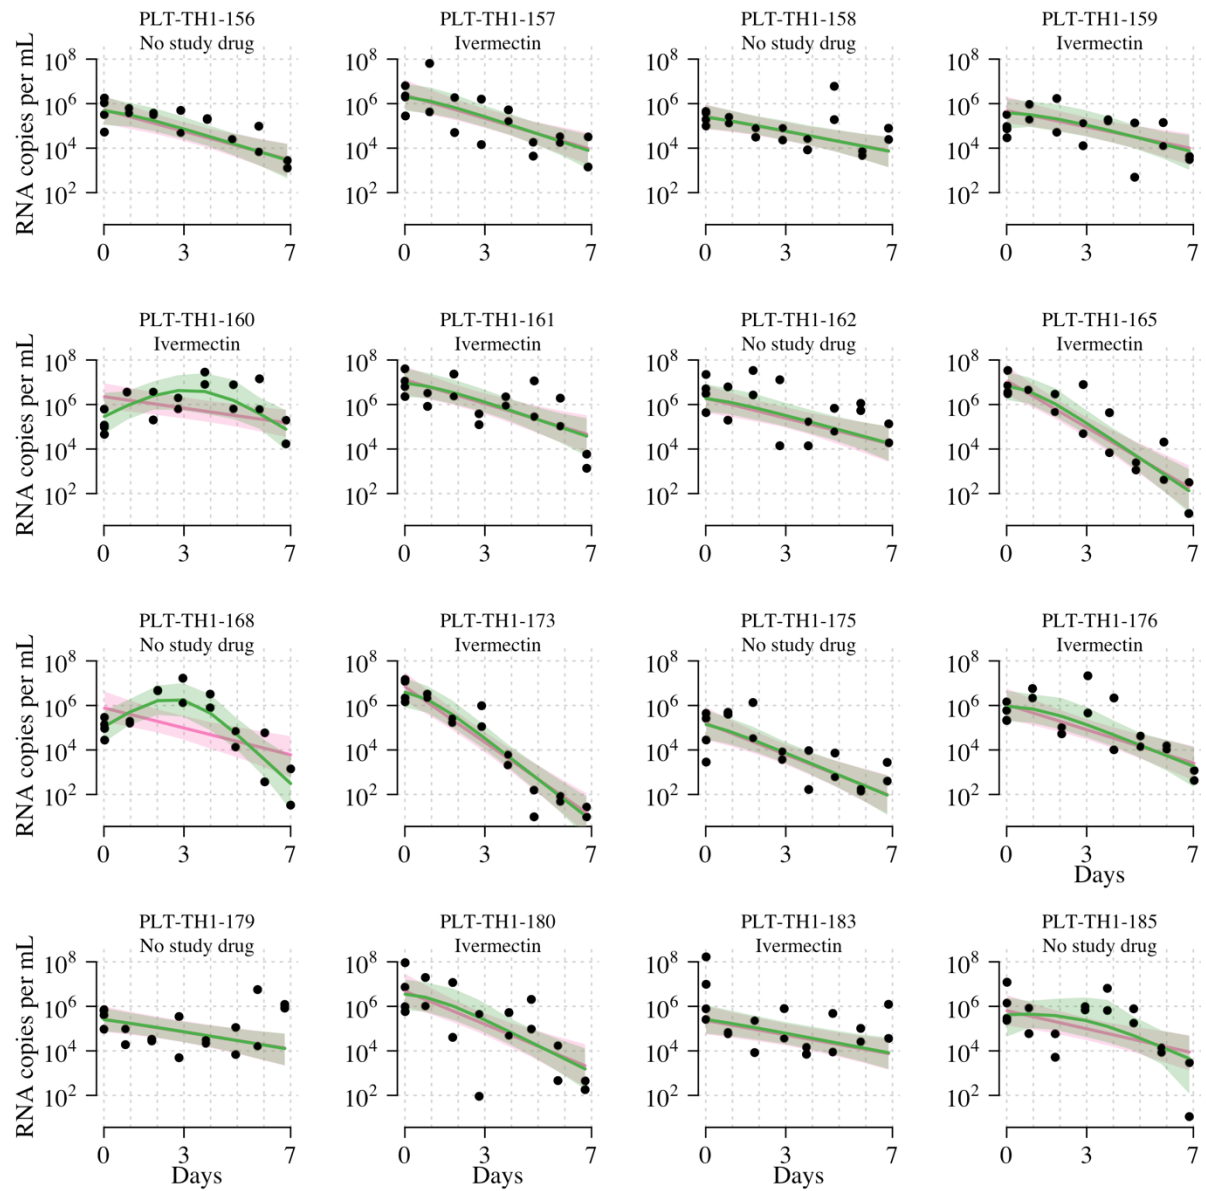

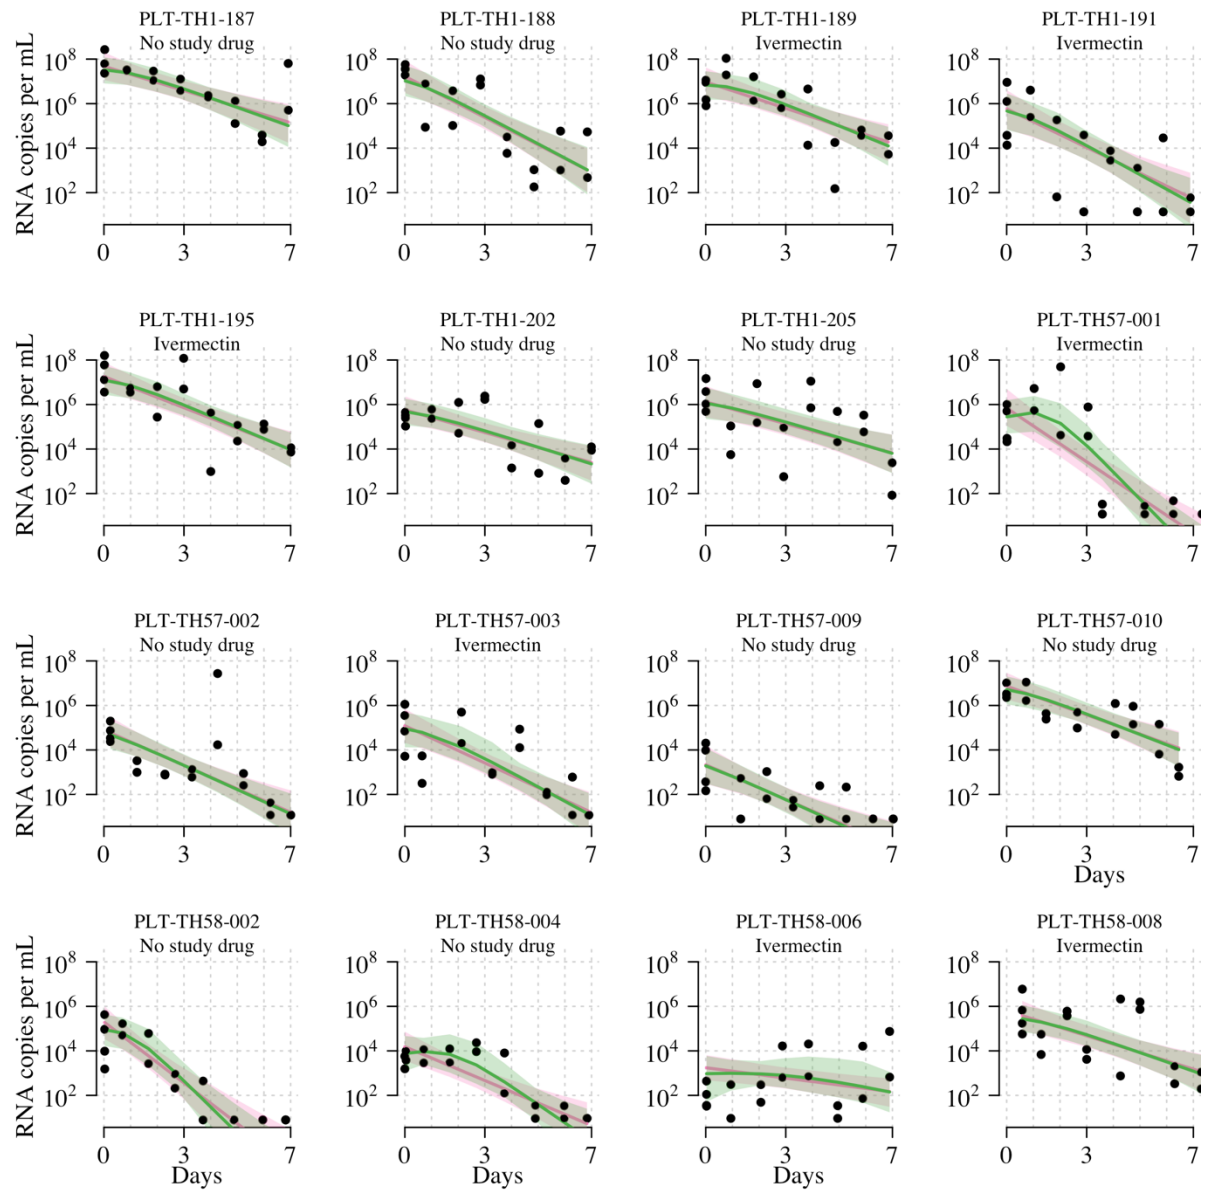

Supplement: supp [file elife_poa_e83201_Figure_5_figure_supplement_2.pdf › elife_poa_e83201_Figure_5_figure_supplement_2.pdf]
